# Supplementary material for: Fecal transplant prevents gut dysbiosis and anxiety-like behaviour after spinal cord injury in rats
Source: PLOS journal article supplement (doi:10.1371/journal.pone.0226128), 2020-01-15

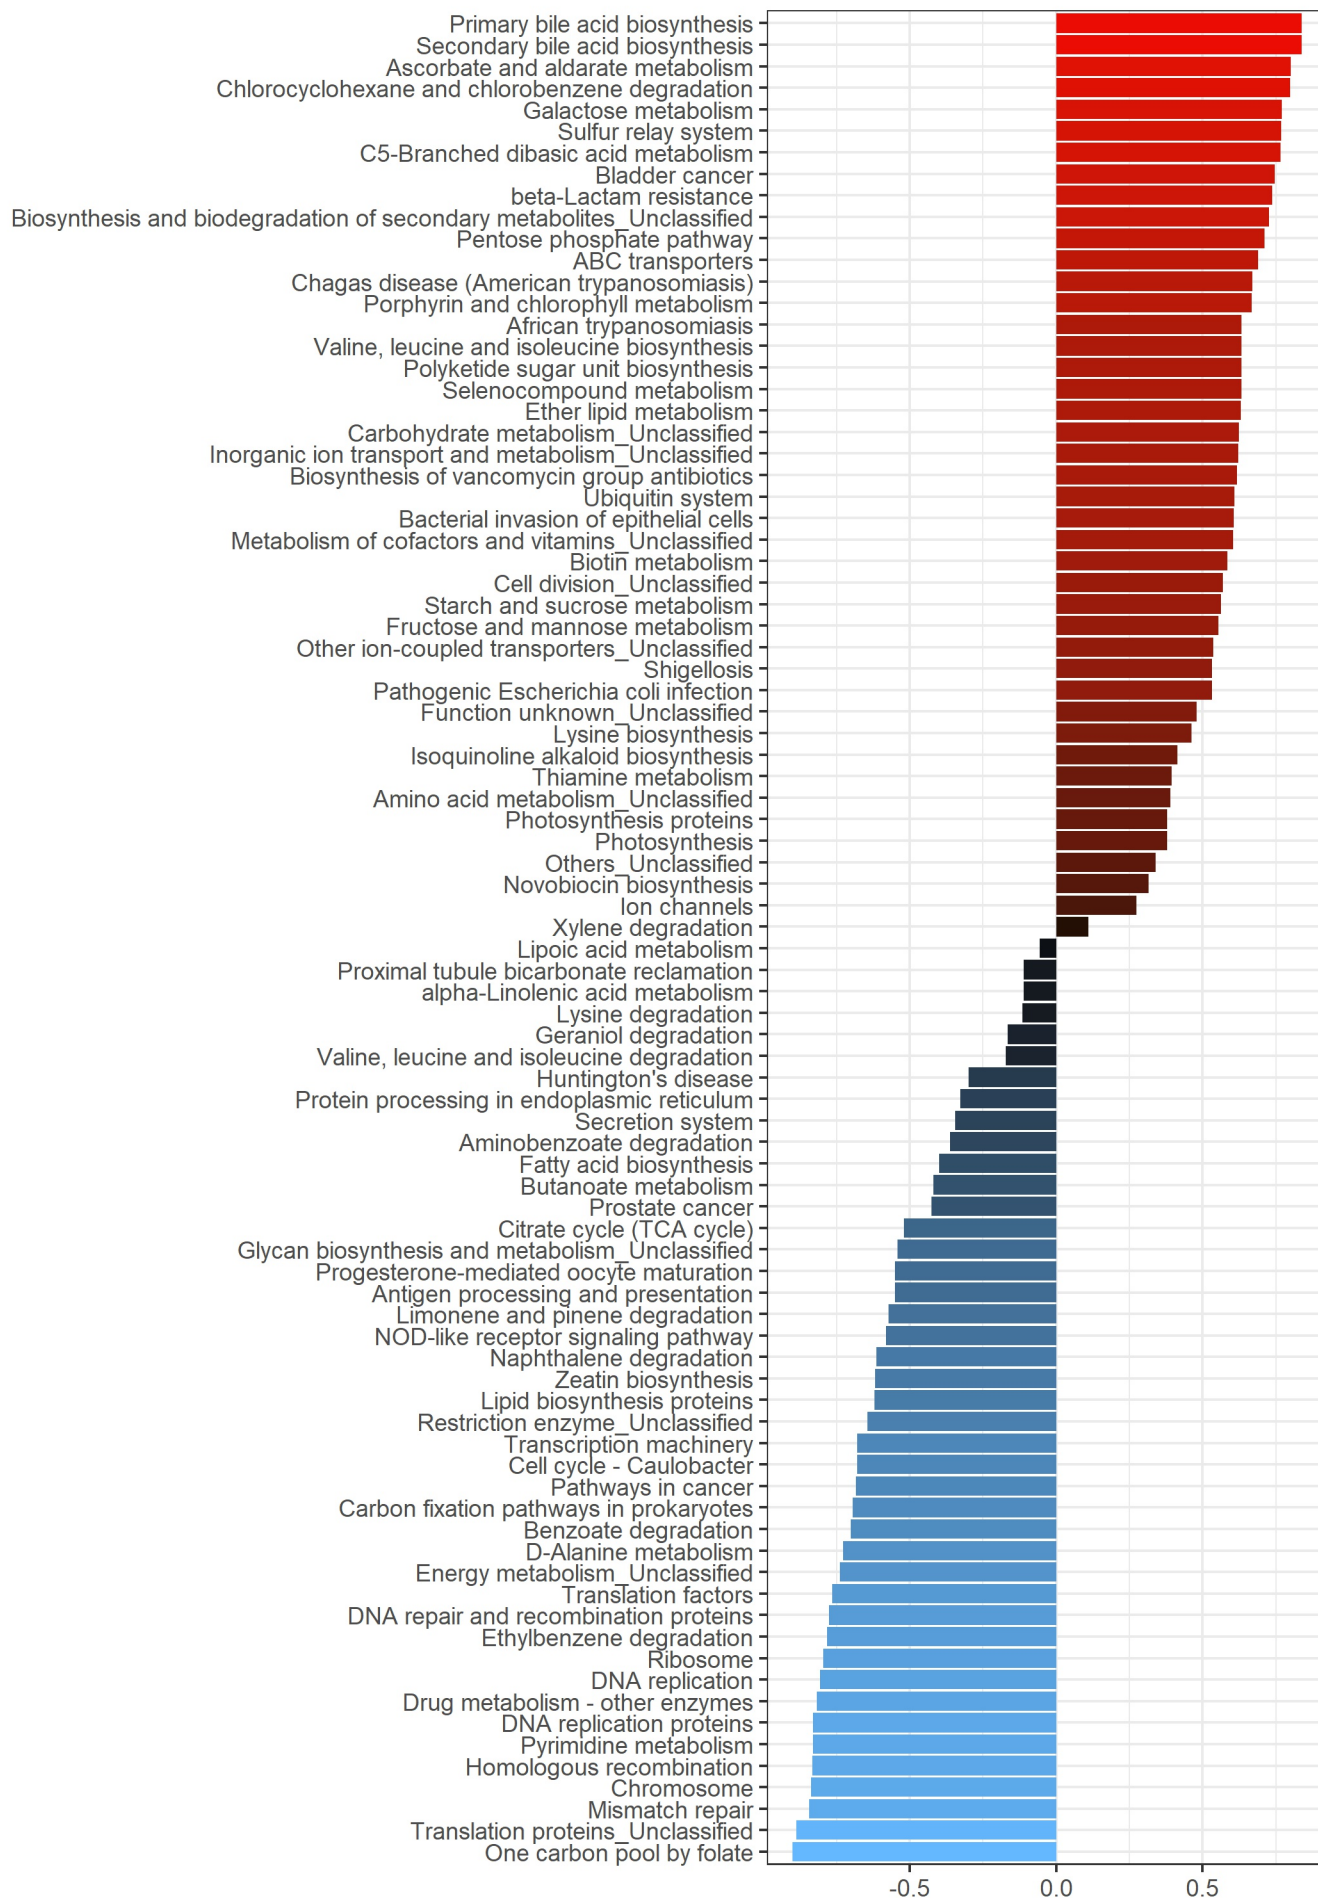

Supplement: S4 (10.1371/journal.pone.0226128.s004) [file journal.pone.0226128.s004]
